# Supplementary material for: Efficacy and Mechanism of Quercetin in the Treatment of Experimental Colitis Using Network Pharmacology Analysis
Source: MDPI journal article supplement (doi:10.3390/molecules28010146), 2022-12-24
Supplement: s1 [file s1]

**Table S1. Topological analysis results of main target network.**

| Targets  | Degree | Betweenness | Closeness   |
|----------|--------|-------------|-------------|
| TP53     | 117    | 0.055373284 | 0.795918367 |
| AKT1     | 117    | 0.04963017  | 0.795918367 |
| TNF      | 112    | 0.046052317 | 0.776119403 |
| IL6      | 110    | 0.041614556 | 0.768472906 |
| VEGFA    | 109    | 0.03820015  | 0.76097561  |
| CASP3    | 102    | 0.024361759 | 0.735849057 |
| IL1B     | 99     | 0.02340656  | 0.728971963 |
| EGFR     | 95     | 0.026241713 | 0.71559633  |
| MYC      | 94     | 0.019600855 | 0.712328767 |
| ESR1     | 93     | 0.025129339 | 0.705882353 |
| PTGS2    | 92     | 0.026761069 | 0.705882353 |
| HIF1A    | 92     | 0.013973436 | 0.702702703 |
| MMP9     | 89     | 0.026755905 | 0.693333333 |
| EGF      | 87     | 0.017712971 | 0.68722467  |
| HSP90AA1 | 85     | 0.024082187 | 0.684210526 |
| CCND1    | 84     | 0.010874663 | 0.67826087  |
| PTEN     | 82     | 0.014592393 | 0.672413793 |
| SRC      | 82     | 0.008720338 | 0.672413793 |
| PPARG    | 82     | 0.026125668 | 0.672413793 |
| CXCL8    | 79     | 0.008244547 | 0.663829787 |
| ERBB2    | 77     | 0.019298793 | 0.658227848 |
| CCL2     | 77     | 0.009824196 | 0.655462185 |
| FOS      | 76     | 0.009270428 | 0.655462185 |
| IL10     | 73     | 0.007278643 | 0.647302905 |
| CASP8    | 71     | 0.008450925 | 0.639344262 |
| BCL2L1   | 69     | 0.005797696 | 0.634146341 |
| RELA     | 65     | 0.005690601 | 0.626506024 |
| HMOX1    | 65     | 0.005732155 | 0.624       |
| MAPK1    | 63     | 0.006975278 | 0.621513944 |
| SERPINE1 | 57     | 0.00558362  | 0.604651163 |
| AR       | 56     | 0.005933897 | 0.6         |
| PPARA    | 54     | 0.012369688 | 0.6         |
| CRP      | 50     | 0.010112801 | 0.590909091 |

**Table S2. The enrichment pathways corresponding to intersection genes.**

| Description                                          | Count | Pvalue                 |
|------------------------------------------------------|-------|------------------------|
| Pathways in cancer                                   | 65    | $4.17 \times 10^{-72}$ |
| Lipid and atherosclerosis                            | 42    | $1.31 \times 10^{-54}$ |
| AGE-RAGE signaling pathway in diabetic complications | 31    | $3.27 \times 10^{-47}$ |
| IL-17 signaling pathway                              | 25    | $3.21 \times 10^{-36}$ |
| PI3K-Akt signaling pathway                           | 36    | $5.43 \times 10^{-36}$ |
| TNF signaling pathway                                | 24    | $2.81 \times 10^{-32}$ |
| Colorectal cancer                                    | 20    | $8.06 \times 10^{-28}$ |
| MAPK signaling pathway                               | 28    | $3.21 \times 10^{-27}$ |
| Coronavirus disease - COVID-19                       | 25    | $1.01 \times 10^{-25}$ |
| Toll-like receptor signaling pathway                 | 18    | $1.27 \times 10^{-22}$ |
| ErbB signaling pathway                               | 17    | $1.42 \times 10^{-22}$ |
| Amoebiasis                                           | 17    | $3.97 \times 10^{-21}$ |
| NF-kappa B signaling pathway                         | 17    | $5.64 \times 10^{-21}$ |
| Th17 cell differentiation                            | 17    | $1.11 \times 10^{-20}$ |
| T cell receptor signaling pathway                    | 16    | $2.31 \times 10^{-19}$ |
| NOD-like receptor signaling pathway                  | 17    | $1.20 \times 10^{-16}$ |
| JAK-STAT signaling pathway                           | 15    | $7.78 \times 10^{-15}$ |
| Inflammatory bowel disease                           | 10    | $1.50 \times 10^{-12}$ |
| Th1 and Th2 cell differentiation                     | 10    | $5.38 \times 10^{-11}$ |
| Inflammatory mediator regulation of TRP channels     | 8     | $4.70 \times 10^{-08}$ |

**Table S3. The affinity scores of quercetin with the top 10 targets.**

| Targets       | Affinity |
|---------------|----------|
| TP53          | -7.438   |
| AKT1          | -6.724   |
| TNF- $\alpha$ | -7.401   |
| IL-6          | -7.318   |
| VEGFA         | -7.42    |
| CASP3         | -7.535   |
| IL-1 $\beta$  | -7.599   |
| EGFR          | -6.91    |
| MYC           | -6.752   |
| ESR1          | -9.298   |
